# Supplementary material
Source: Springer Nature journal article supplement (https://www.springermedizin.de/resource/supplementary/13014_2005_7_MOESM7_ESM.pdf/9632806)

**Isodoses (Gy)**

- 74.500
- 69.630
- 66.149
- 59.400
- 56.400
- 54.000
- 51.300
- 40.000
- 35.000
- 30.000
- 26.000

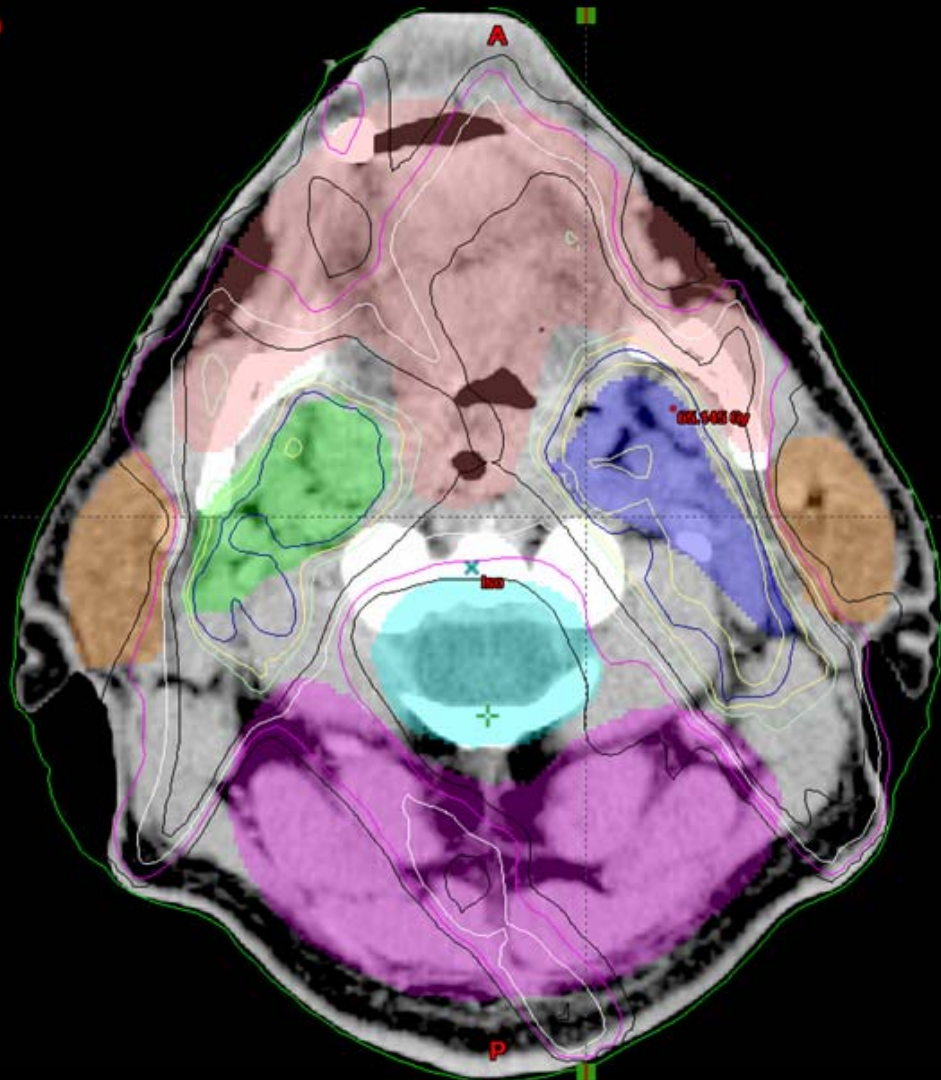

Supplement: MOESM7 [file 9632806]
